# Supplementary material for: Intracortical Microelectrode Array Unit Yield under Chronic Conditions: A Comparative Evaluation
Source: MDPI journal article supplement (doi:10.3390/mi12080972), 2021-08-17
Supplement: s1 [file s1]

## Supplementary Materials

### Intracortical Microelectrode Array Unit Yield under Chronic Conditions: A Comparative Evaluation

Joshua O. Usoro<sup>1</sup>, Brandon S. Sturgill<sup>1</sup>, Kate C. Musselman<sup>1</sup>, Jeffrey R. Capadona<sup>2,3</sup>  
and Joseph J. Pancrazio<sup>1,\*</sup>

<sup>1</sup> Department of Bioengineering, The University of Texas at Dallas, Richardson, TX 75080, USA; joshua.usoro@utdallas.edu (J.O.U.); brandon.sturgill@utdallas.edu (B.S.S.); katecmusselman@gmail.com (K.C.M.)

<sup>2</sup> Department of Biomedical Engineering, Case Western Reserve University, Cleveland, OH 44106, USA; jrc35@case.edu

<sup>3</sup> Advanced Platform Technology Center, L. Stokes Cleveland VA Medical Center, Rehabilitation Research and Development, Cleveland, OH 44106, USA

\* Correspondence: joseph.pancrazio@utdallas.edu

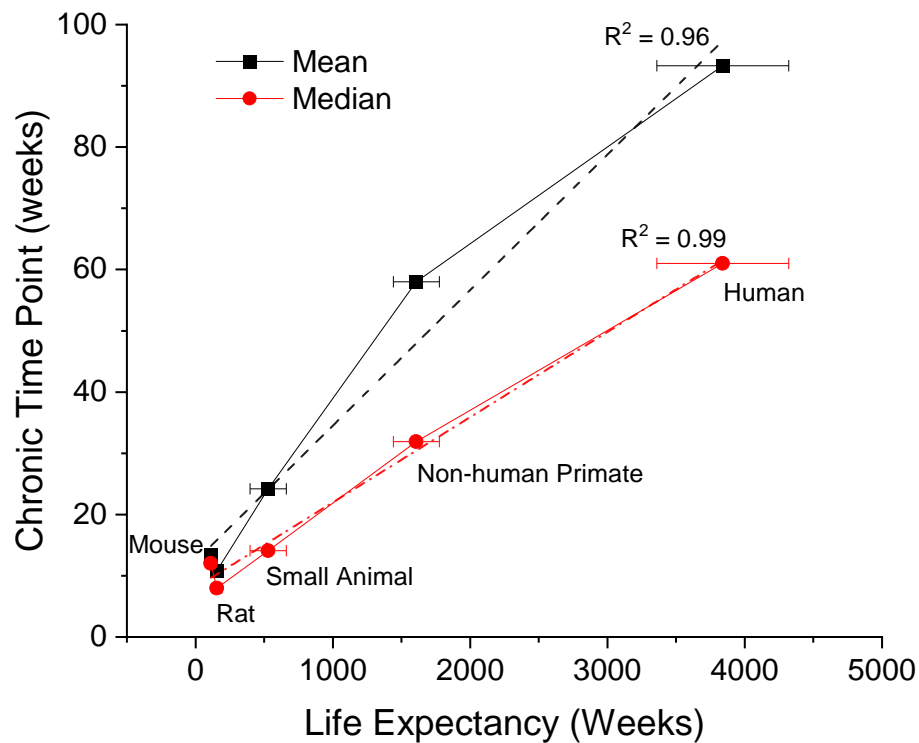

**Figure S1.** Chronic durations based on life expectancy. Mean (black square) and median (red circle) chronic duration are plotted as a function of the life expectancy of the animal model. Horizontal error bars reflect the average life span range of the animal model. Mean and median data points were fitted with a linear function indicated by the dashed lines. Adjusted  $R^2$  values that indicate goodness of fit are reported as well.

**Table S1.** Chronic time point statistics based on device used

| <b>Metric (in Weeks)</b> | <b>Custom</b>                                                                                                                                                                     | <b>Microwire</b>                                                                 | <b>NeuroNexus</b>                                                   | <b>Blackrock</b>                                                                                   |
|--------------------------|-----------------------------------------------------------------------------------------------------------------------------------------------------------------------------------|----------------------------------------------------------------------------------|---------------------------------------------------------------------|----------------------------------------------------------------------------------------------------|
| Number of Studies        | 71                                                                                                                                                                                | 23                                                                               | 25                                                                  | 43                                                                                                 |
| Mean                     | 19.1                                                                                                                                                                              | 23.8                                                                             | 9.98                                                                | 59.5                                                                                               |
| Median                   | 10.0                                                                                                                                                                              | 9.00                                                                             | 11.4                                                                | 44.0                                                                                               |
| Range                    | 0.429 - 34.7                                                                                                                                                                      | 2.00 - 156                                                                       | 0.429 – 27.0                                                        | 2.00 - 282                                                                                         |
| Standard Deviation       | 29.1                                                                                                                                                                              | 34.1                                                                             | 6.74                                                                | 57.8                                                                                               |
| References               | [16,22,28,30–34,36,39,40,42,45–49,51–55,57,59–62,66,70–72,74,79,83,84,86,88–90,92–96,100,101,104,106–109,111,114,120,123,126–128,130,131,135,138,140,153,155,159,160,162,163,167] | [35,56,58,63,73,75,76,80–82,105,112,115,119,121,125,129,136,146,156,158,161,164] | [24–27,37,38,41,43,44,50,64,65,67–69,77,78,85,87,91,97,102,110,122] | [1,3,4,7,29,98,99,103,113,116–118,124,132–134,137,139,141–145,147–152,154,157,165,166,168–173,192] |

**Table S2.** Chronic time point statistics based on device used in a mouse model

| <b>Metric (in Weeks)</b> | <b>Custom</b>                          | <b>Microwire</b> | <b>NeuroNexus</b>         | <b>Blackrock</b> |
|--------------------------|----------------------------------------|------------------|---------------------------|------------------|
| Number of Studies        | 13                                     | 1                | 8                         | 0                |
| Mean                     | 13.9                                   | 8.00             | 14.4                      | N/A              |
| Median                   | 12.0                                   | 8.00             | 16.0                      | N/A              |
| Range                    | 1.00 – 34.7                            | N/A              | 0.429 – 27.0              | N/A              |
| Standard Deviation       | 9.90                                   | N/A              | 7.33                      | N/A              |
| References               | [30–32,34,36,40,42,45,46,48,49,88,106] | [35]             | [24,25,37,38,41,43,44,50] | N/A              |

**Table S3.** Chronic time point statistics based on device used in a rat model

| <b>Metric (in Weeks)</b> | <b>Custom</b> | <b>Microwire</b> | <b>NeuroNexus</b> | <b>Blackrock</b> |
|--------------------------|---------------|------------------|-------------------|------------------|
| Number of Studies        | 39            | 10               | 16                | 4                |
| Mean                     | 11.2          | 9.29             | 8.07              | 22.5             |
| Median                   | 8.00          | 5.50             | 6.00              | 24.0             |
| Range                    | 1.00–52.0     | 2.00–39.0        | 1.00–16.0         | 12.0–30.0        |
| Standard Deviation       | 9.69          | 11.1             | 5.62              | 7.55             |

|            |                                                                                         |                               |                                                  |                |
|------------|-----------------------------------------------------------------------------------------|-------------------------------|--------------------------------------------------|----------------|
| References | [16,22,28,33,48,51–55,57,59–62,66,70–72,74,79,83,84,86,89,90,92–96,100,101,104,106–109] | [56,58,63,73,75,76,80–82,105] | [26,27,38,64,65,67–69,77,78,85,87,91,97,102,110] | [29,98,99,103] |
|------------|-----------------------------------------------------------------------------------------|-------------------------------|--------------------------------------------------|----------------|

**Table S4.** Chronic time point statistics based on device used in a small animal model

| Metric (in Weeks)  | Custom                                | Microwire                 | NeuroNexus | Blackrock                 |
|--------------------|---------------------------------------|---------------------------|------------|---------------------------|
| Number of Studies  | 10                                    | 6                         | 1          | 8                         |
| Mean               | 26.3                                  | 13.7                      | 5.00       | 34.5                      |
| Median             | 17.2                                  | 6.86                      | 5.00       | 39.5                      |
| Range              | 0.700–96.0                            | 4.33–36.0                 | N/A        | 12.9–52.0                 |
| Standard Deviation | 29.6                                  | 13.3                      | N/A        | 18.4                      |
| References         | [111,114,120,123,126–128,130,131,135] | [112,115,119,121,125,129] | [122]      | [113,116–118,124,132–134] |

**Table S5.** Chronic time point statistics based on device used in a non-human primate model

| Metric (in Weeks)  | Custom                            | Microwire                 | NeuroNexus | Blackrock                                       |
|--------------------|-----------------------------------|---------------------------|------------|-------------------------------------------------|
| Number of Studies  | 8                                 | 6                         | 0          | 19                                              |
| Mean               | 56.6                              | 60.6                      | N/A        | 57.7                                            |
| Median             | 23.0                              | 37.6                      | N/A        | 44.0                                            |
| Range              | 1.43–163                          | 26.3–156                  | N/A        | 12.0–156                                        |
| Standard Deviation | 67.5                              | 50.1                      | N/A        | 50.3                                            |
| References         | [138,140,153,155,159,160,162,163] | [136,146,156,158,161,164] | N/A        | [3,124,133,137,139,141–145,147–152,154,157,192] |

**Table S6.** Chronic time point statistics based on device used in a human model

| Metric (in Weeks)  | Custom | Microwire | NeuroNexus | Blackrock               |
|--------------------|--------|-----------|------------|-------------------------|
| Number of Studies  | 1      | 0         | 0          | 11                      |
| Mean               | 26.0   | N/A       | N/A        | 99.4                    |
| Median             | 26.0   | N/A       | N/A        | 70                      |
| Range              | N/A    | N/A       | N/A        | 26.0–282                |
| Standard Deviation | N/A    | N/A       | N/A        | 78.0                    |
| References         | [167]  | N/A       | N/A        | [1,4,7,165,166,168–173] |

**Table S7.** Chronic time point statistics based on publication year

| <b>Metric (in Weeks)</b> | <b>≤ 2000</b>                    | <b>2001 - 2005</b>             | <b>2006 - 2010</b>                                   | <b>2011 - 2015</b>                                                                                | <b>2016 - 2020</b>                                                                           |
|--------------------------|----------------------------------|--------------------------------|------------------------------------------------------|---------------------------------------------------------------------------------------------------|----------------------------------------------------------------------------------------------|
| Number of Studies        | 14                               | 13                             | 29                                                   | 48                                                                                                | 56                                                                                           |
| Mean                     | 35.2                             | 25.6                           | 25.1                                                 | 34.5                                                                                              | 26.9                                                                                         |
| Median                   | 14.0                             | 8.00                           | 8.57                                                 | 16.0                                                                                              | 16.0                                                                                         |
| Range                    | 3.71–163                         | 1.00–156                       | 1.00–156                                             | 1.00–282                                                                                          | 0.429–172                                                                                    |
| Standard Deviation       | 52.1                             | 43.9                           | 32.0                                                 | 50.9                                                                                              | 35.0                                                                                         |
| References               | [58,113,120–122,130–135,161–163] | [26,59–65,126,127,136,137,164] | [1,27,34,48,51,53,66–78,114,115,129,138–141,146,168] | [3,7,22,25,28,33,35–39,54–56,79–84,86–91,109,110,116,117,119,124,125,142–145,147–150,169–171,192] | [4,16,24,29–32,40–47,49,50,52,57,92–102,104–108,111,112,118,123,128,151–160,165–167,172,173] |

**Table S8.** Chronic time point statistics based on publication year in a mouse model

| <b>Metric (in Weeks)</b> | <b>≤ 2000</b> | <b>2001 - 2005</b> | <b>2006 - 2010</b> | <b>2011 - 2015</b> | <b>2016 - 2020</b>     |
|--------------------------|---------------|--------------------|--------------------|--------------------|------------------------|
| Number of Studies        | 0             | 0                  | 2                  | 6                  | 14                     |
| Mean                     | N/A           | N/A                | 8.50               | 15.0               | 14.1                   |
| Median                   | N/A           | N/A                | 8.50               | 16.0               | 12.0                   |
| Range                    | N/A           | N/A                | 1.00–16.0          | 4.00–27.0          | 0.429–34.7             |
| Standard Deviation       | N/A           | N/A                | 7.50               | 8.15               | 9.11                   |
| References               | N/A           | N/A                | [48,72]            | [25,35–39]         | [24,30–32,40–47,49,50] |

**Table S9.** Chronic time point statistics based on publication year in a rat model

| <b>Metric (in Weeks)</b> | <b>≤ 2000</b> | <b>2001 - 2005</b> | <b>2006 - 2010</b> | <b>2011 - 2015</b> | <b>2016 - 2020</b> |
|--------------------------|---------------|--------------------|--------------------|--------------------|--------------------|
| Number of Studies        | 0             | 8                  | 17                 | 22                 | 21                 |
| Mean                     | N/A           | 5.13               | 8.60               | 10.5               | 15.5               |
| Median                   | N/A           | 5.00               | 6.00               | 7.00               | 13.0               |
| Range                    | N/A           | 1.00–12.0          | 3.00–26.0          | 1.00–39.0          | 4.33–52.0          |
| Standard Deviation       | N/A           | 3.72               | 6.25               | 9.53               | 11.3               |

|            |     |            |                                  |                                       |                                        |
|------------|-----|------------|----------------------------------|---------------------------------------|----------------------------------------|
| References | N/A | [26,59–65] | [26,27,48,51,53,6<br>6,67,69–78] | [22,28,33,38,54–<br>56,79–91,109,110] | [16,29,98–<br>107,52,108,57,<br>92–97] |
|------------|-----|------------|----------------------------------|---------------------------------------|----------------------------------------|

**Table S10.** Chronic time point statistics based on publication year in a small animal model

| <b>Metric (in Weeks)</b> | <b>≤ 2000</b>                 | <b>2001 - 2005</b> | <b>2006 - 2010</b> | <b>2011 - 2015</b>        | <b>2016 - 2020</b>        |
|--------------------------|-------------------------------|--------------------|--------------------|---------------------------|---------------------------|
| Number of Studies        | 10                            | 2                  | 3                  | 5                         | 5                         |
| Mean                     | 15.7                          | 23.7               | 33.2               | 31.9                      | 32.7                      |
| Median                   | 12.9                          | 23.7               | 36.0               | 32.0                      | 10.0                      |
| Range                    | 3.71–52.0                     | 21.4–26.0          | 4.33–59.3          | 4.33–52.0                 | 0.700–96.0                |
| Standard Deviation       | 14.0                          | 3.23               | 27.6               | 19.1                      | 40.9                      |
| References               | [113,120–<br>122,130–<br>135] | [126,127]          | [114,115,129]      | [116,117,119,124,1<br>25] | [111,112,118,1<br>23,128] |

**Table S11.** Chronic time point statistics based on publication year in a non-human primate model

| <b>Metric (in Weeks)</b> | <b>≤ 2000</b>     | <b>2001 - 2005</b> | <b>2006 - 2010</b> | <b>2011 - 2015</b>                      | <b>2016 - 2020</b> |
|--------------------------|-------------------|--------------------|--------------------|-----------------------------------------|--------------------|
| Number of Studies        | 4                 | 3                  | 5                  | 11                                      | 10                 |
| Mean                     | 91.4              | 81.7               | 70.1               | 55.4                                    | 34.2               |
| Median                   | 93.9              | 76.0               | 52.0               | 52.0                                    | 25.0               |
| Range                    | 14.3–163          | 13.0–156           | 26.3–156           | 12.0–156                                | 1.43–150           |
| Standard Deviation       | 79.3              | 71.7               | 50.8               | 46.5                                    | 42.7               |
| References               | [133,161–<br>163] | [136,137,164]      | [138–141,146]      | [3,124,142–<br>145,147,149,150,1<br>92] | [152–160]          |

**Table S12.** Chronic time point statistics based on publication year in a human model

| <b>Metric (in Weeks)</b> | <b>≤ 2000</b> | <b>2001 - 2005</b> | <b>2006 - 2010</b> | <b>2011 - 2015</b> | <b>2016 - 2020</b>      |
|--------------------------|---------------|--------------------|--------------------|--------------------|-------------------------|
| Number of Studies        | 0             | 0                  | 2                  | 4                  | 6                       |
| Mean                     | N/A           | N/A                | 35.5               | 142                | 80.1                    |
| Median                   | N/A           | N/A                | 35.5               | 117                | 61.0                    |
| Range                    | N/A           | N/A                | 32.0–39.0          | 52.0–282           | 26.0–172                |
| Standard Deviation       | N/A           | N/A                | 3.50               | 101                | 60.2                    |
| References               | N/A           | N/A                | [1,168]            | [7,169–171]        | [4,165–<br>167,172,173] |

**Table S13.** Chronic time point statistics based on geographical region

| <b>Metric (in Weeks)</b> | <b>North America</b>                                                                         | <b>Europe</b>                                    | <b>Asia</b>     | <b>Other</b>  |
|--------------------------|----------------------------------------------------------------------------------------------|--------------------------------------------------|-----------------|---------------|
| Number of Studies        | 132                                                                                          | 17                                               | 6               | 3             |
| Mean                     | 31.8                                                                                         | 14.2                                             | 21.7            | 22.4          |
| Median                   | 14.3                                                                                         | 12.0                                             | 7.00            | 30.3          |
| Range                    | 0.429–282                                                                                    | 0.700–30.0                                       | 4.00–98.6       | 1.00–36.0     |
| Standard Deviation       | 44.8                                                                                         | 9.11                                             | 37.7            | 18.8          |
| References               | [1,4,7,16,22,24–30,32–44,58–109,112–118,120–124,126–128,130–145,147–156,161–166,168–173,192] | [31,48–50,53–57,111,119,125,146,157,159,160,167] | [3,45–47,51,52] | [110,129,158] |

**Table S14.** Chronic time point statistics based on animal model in North America

| <b>Metric (in Weeks)</b> | <b>Mouse</b>           | <b>Rat</b>                 | <b>Small Animal</b>               | <b>Non-Human Primate</b>              | <b>Human</b>            |
|--------------------------|------------------------|----------------------------|-----------------------------------|---------------------------------------|-------------------------|
| Number of Studies        | 15                     | 60                         | 21                                | 27                                    | 11                      |
| Mean                     | 14.4                   | 11.1                       | 26.7                              | 63.7                                  | 99.4                    |
| Median                   | 16.0                   | 8.00                       | 14.3                              | 44.0                                  | 70.0                    |
| Range                    | 0.429–34.7             | 1.00–52.0                  | 3.71–96.0                         | 1.43–163                              | 26.0–282                |
| Standard Deviation       | 9.05                   | 9.82                       | 24.3                              | 55.3                                  | 78.0                    |
| References               | [24,25,30,32,35–44,72] | [16,22,26–29,33,38,58–109] | [112–118,120–124,126–128,130–135] | [124,133,136–145,147–156,161–164,192] | [1,4,7,165,166,168–173] |

**Table S15.** Chronic time point statistics based on animal model in Europe

| <b>Metric (in Weeks)</b> | <b>Mouse</b> | <b>Rat</b> | <b>Small Animal</b> | <b>Non-Human Primate</b> | <b>Human</b> |
|--------------------------|--------------|------------|---------------------|--------------------------|--------------|
| Number of Studies        | 3            | 6          | 3                   | 4                        | 1            |
| Mean                     | 19.3         | 11.7       | 9.68                | 16.1                     | 26.0         |
| Median                   | 16.0         | 13.5       | 4.33                | 16.0                     | 26.0         |
| Range                    | 12–30        | 3.86–17.3  | 0.700–24.0          | 6.00–26.3                | N/A          |
| Standard Deviation       | 9.45         | 5.57       | 12.5                | 10.5                     | N/A          |
| References               | [48–50]      | [48,53–57] | [111,119,125]       | [146,157,159,160]        | [167]        |

**Table S16.** Chronic time point statistics based on animal model in Asia

| <b>Metric (in Weeks)</b> | <b>Mouse</b> | <b>Rat</b> | <b>Small Animal</b> | <b>Non-Human Primate</b> | <b>Human</b> |
|--------------------------|--------------|------------|---------------------|--------------------------|--------------|
| Number of Studies        | 3            | 2          | 0                   | 1                        | 0            |

|                       |           |           |     |      |     |
|-----------------------|-----------|-----------|-----|------|-----|
| Mean                  | 7.00      | 5.17      | N/A | 98.6 | N/A |
| Median                | 8.00      | 5.17      | N/A | 98.6 | N/A |
| Range                 | 4.00–9.00 | 4.33–6.00 | N/A | N/A  | N/A |
| Standard<br>Deviation | 2.65      | 1.18      | N/A | N/A  | N/A |
| References            | [45–47]   | [51,52]   | N/A | [3]  | N/A |

## References

192. Callier, T.; Schluter, E.W.; Tabot, G.A.; Miller, L.E.; Tenore, F. V.; Bensmaia, S.J. Long-term stability of sensitivity to intracortical microstimulation of somatosensory cortex. *J. Neural Eng.* **2015**, *12*, doi:10.1088/1741-2560/12/5/056010.
